# Supplementary material for: GlycoTAIL and FlexiTAIL as Half-Life Extension Modules for Recombinant Antibody Fragments
Source: MDPI journal article supplement (doi:10.3390/molecules27103272), 2022-05-19
Supplement: s1 [file s1]

## Supplement Figure 1:

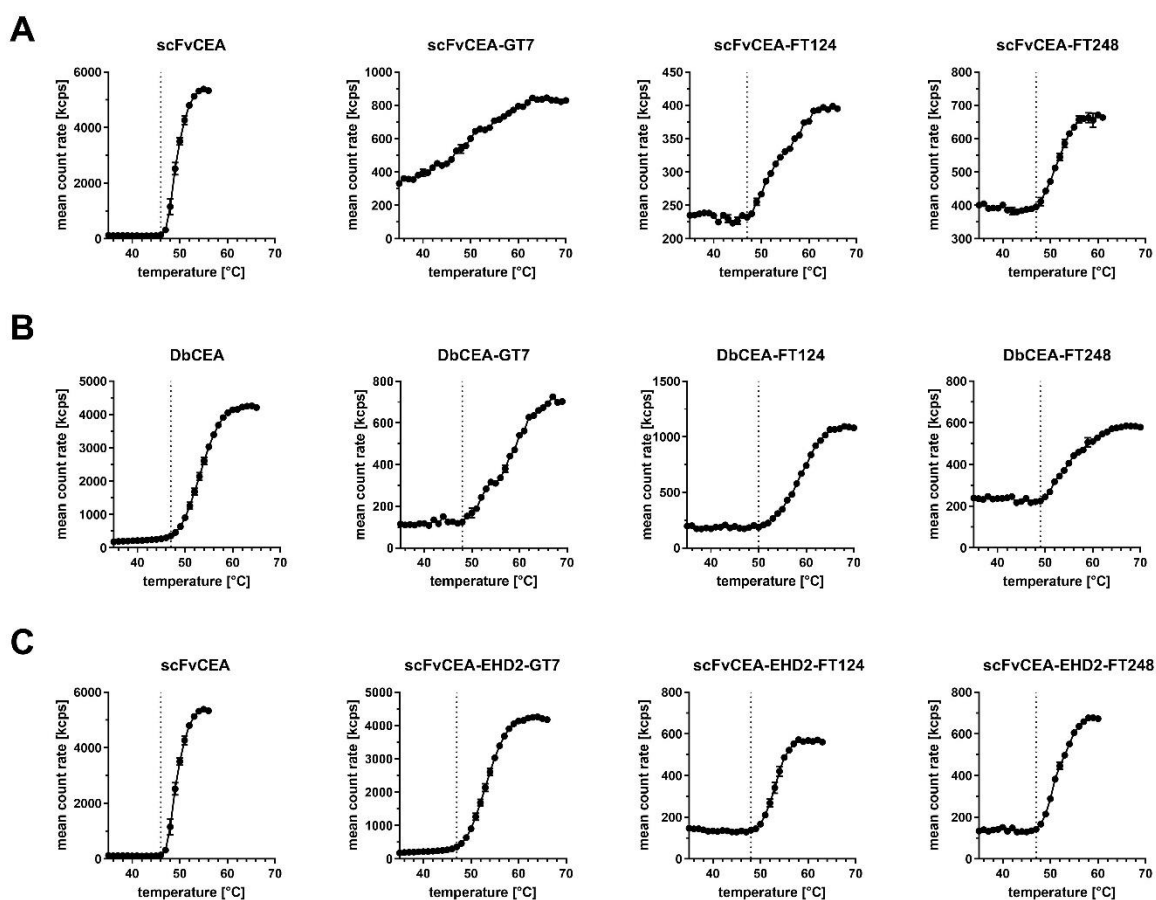

**Figure S1: Determination of aggregation point of different antibodies.** Aggregation point of the different antibodies were determined by dynamic light scattering (DLS). Aggregation points were defined as the temperature where a strong increase in signal was induced (indicated as dotted line). Determination of monovalent scFvCEA-based (**A**), of DbCEA-based (**B**), and of scFvCEA-EHD2-based (**C**) antibody molecules.
